# Supplementary material for: Examining the implications of photochemical indicators on the O 3 -NO x -VOC sensitivity and control strategies: A case study in the Yangtze River Delta (YRD), China
Source: Copernicus journal article supplement (doi:10.5194/acp-2022-493), 2022-07-22
Supplement: Supplementary file [file acp-2022-493-AC1-supplement.pdf]

**We thank the reviewer for the comments that improve the quality of the paper. The detailed responses are given as follows. The reviewers' comments are shown in italic font, the responses are in regular blue font, and the revised text is in blue bold font.**

### **Response to Referee #1**

*The values of photochemical indicators are widely used to determine the O<sub>3</sub>-NO<sub>x</sub>-VOC sensitivity with measurements, which has important policy implications. This work examined the effectiveness of four indicators such as PH<sub>2</sub>O<sub>2</sub>/PHNO<sub>3</sub>, and surface HCHO/NO<sub>2</sub> with air quality models. It can provide decision-makers with some useful information when they use the photochemical indicators to make control strategies. The manuscript is well written and fits the scope of ACP, which is worthy of publication. However, there are a few questions as follows that need to be addressed to further improve the manuscript.*

*Major comments/questions:*

**Comment 1:** *What are the influences of regional transport on the results?*

**Response 1:** Regional transport can alter the spatial distribution of NO<sub>x</sub> and VOCs and thus influences O<sub>3</sub>-precursor sensitivity. For example, Zhao et al. (2022) reported that O<sub>3</sub> production in the YRD tended to be NO<sub>x</sub>-limited when source contribution from Zhejiang was elevated, which is mainly associated with the regional transport of VOCs from Zhejiang. Accordingly, the indicator (HO<sub>2</sub>/OH) values increased. In contrast, O<sub>3</sub> production was VOC-limited with larger contributions from NO<sub>x</sub> emissions in Jiangsu and Anhui, and HO<sub>2</sub>/OH decreased. Therefore, we would expect that regional transport can change indicator values.

In this study, we determined O<sub>3</sub>-precursor sensitivity for two simulation periods (2017 vs 2018) with different meteorology, and this can reflect the influence of regional transport on the effectiveness of photochemical indicators to some extent (see Section 3.2). As shown in Table 4, the accuracy is comparable in the two pairs of simulations, i.e., Sim\_2017+Jiangsu vs Sim\_2018+Jiangsu, Sim\_2017+Other vs Sim\_2018+Other. Although regional transport changes the values of indicators, it might have a minor influence on the performance of photochemical indicators.

**Comment 2:** *How will NH<sub>3</sub> and inorganic aerosols such as sulfate, nitrate, and ammonium affect the HCHO/NO<sub>y</sub> and NO<sub>y</sub>?*

**Response 2:** NH<sub>3</sub> and inorganic aerosols do not affect HCHO. However, NH<sub>3</sub> can react with gaseous HNO<sub>3</sub>, a major component of NO<sub>y</sub>, to form particulate nitrate. Therefore, NH<sub>3</sub> affects the abundance of gaseous NO<sub>y</sub>, particularly in cold seasons when the total nitrate (the sum of HNO<sub>3</sub> and particulate nitrate) predominantly resides in particles and under NH<sub>3</sub>-deficient conditions. As NO<sub>y</sub> generally includes gaseous components only when it is used as a (or a part of) photochemical indicator, the NH<sub>3</sub> concentration could affect the values of HCHO/NO<sub>y</sub> and NO<sub>y</sub> under certain conditions. The YRD region is in an NH<sub>3</sub>-rich environment and the formation of nitrate is insensitive to the availability of NH<sub>3</sub> (Wang et al., 2011). Moreover, HNO<sub>3</sub> dominates the total nitrate in summer (Sun et al., 2022). Therefore, the impacts of NH<sub>3</sub> and inorganic aerosols on HCHO/NO<sub>y</sub> and NO<sub>y</sub> could be negligible in this study.

*Some minor issues:*

**Comment 3:** *Page 2 line 45: “, the O<sub>3</sub> to nitric acid ratios (O<sub>3</sub>/HNO<sub>3</sub>), and NO<sub>y</sub>)”*

**Response 3:** Thank you for your comment. We made corrections in the main text.

**Line 45:** “..., the O<sub>3</sub> to nitric acid ratios (O<sub>3</sub>/HNO<sub>3</sub>), and NO<sub>y</sub>) ...”

**Comment 4:** *Figure 1. The letters are skewed.*

**Response 4:** Thank you for your comment. We have updated Figure 1 in the main text.

**Comment 5:** *Page 6 lines 138-140: Why are the 95<sup>th</sup> percentile for the VOC-limited grids and the 5<sup>th</sup> percentile for the NO<sub>x</sub>-limited grids chosen as the boundaries of the transition interval?*

**Response 5:** We used the 5<sup>th</sup> and 95<sup>th</sup> percentiles to define the NO<sub>x</sub>-VOC transition following Sillman et al. (1998) and other studies (Xie et al., 2014; Peng et al., 2011). In these practices, the 5<sup>th</sup> percentile NO<sub>x</sub>-limited values are mostly higher than the 95<sup>th</sup> percentile VOC-limited values, demonstrating that NO<sub>x</sub>-limited and VOC-limited chemistry is successfully distinguished. On the other hand, the percentile values can remove extremely high values in VOC-limited locations and extremely low values in NO<sub>x</sub>-limited locations.

**Comment 6:** Page 11 lines 240-242: I suggest moving this part to the methodology section.

**Response 6:** Thank you for your comment. We have moved the sentence “The feasibility of a given threshold for an indicator applied throughout a region or over a short-term period (the order of 1–2 years) is evaluated in section 3.2.” to Lines 147-148 in the methodology section. However, we keep the other sentence “However, the methodology that is used to derive thresholds can also lead to distinct threshold values, and this is discussed in section 3.4.” as it is, since we want to give a possible explanation of different threshold values derived in this study compared to other studies as shown in Table 3.

**Comment 7:** Page 14 lines 295-296: This seems to conflict with your argument that the emission had no significant influence on the thresholds of PH<sub>2</sub>O<sub>2</sub>/PHNO<sub>3</sub>.

**Response 7:** In Section 3.2, we pointed out that emissions had no significant influence on the performance of indicators in the determination of O<sub>3</sub>-precursor sensitivity. This is based on the comparison between the case “Sim\_2017+Jiangsu” and “Sim\_2017+Other”, which show similar accuracy despite different emissions in Jiangsu and other areas in the YRD (see Table 4). Here, the thresholds derived for one area are applicable to elsewhere on a regional scale. However, we think that thresholds may change with local emissions and thus are location-specific (see Lines 239-240). This could also be the case with significant changes (up to a 100% reduction) in VOC or NO<sub>x</sub> emissions as in O<sub>3</sub> isopleth.

**Comment 8:** The first row of Table 4 was incomplete.

**Response 8:** Thank you for your comment. We have added names for Columns 1-2:

**Table 4:** Evaluation of the photochemical indicators in the YRD (unit of %).

| Case             | Indicators                                        | ErrA_VOC | ErrB_VOC | ErrA_NO <sub>x</sub> | ErrB_NO <sub>x</sub> | OA   |
|------------------|---------------------------------------------------|----------|----------|----------------------|----------------------|------|
| Sim_2017+Jiangsu | PH <sub>2</sub> O <sub>2</sub> /PHNO <sub>3</sub> | 3.9      | 6.6      | 0.1                  | 5.1                  | 94.8 |
|                  | HCHO/NO <sub>2</sub>                              | 2.9      | 5.7      | 0.0                  | 5.1                  | 94.9 |
|                  | HCHO/NO <sub>y</sub>                              | 0.0      | 6.6      | 0.0                  | 4.7                  | 95.2 |
|                  | NO <sub>y</sub>                                   | 0.0      | 5.7      | 0.0                  | 4.9                  | 95.1 |
| Sim_2017+Other   | PH <sub>2</sub> O <sub>2</sub> /PHNO <sub>3</sub> | 7.4      | 0.0      | 0.0                  | 2.0                  | 98.0 |
|                  | HCHO/NO <sub>2</sub>                              | 2.2      | 0.0      | 0.0                  | 1.7                  | 98.3 |
|                  | HCHO/NO <sub>y</sub>                              | 2.1      | 0.0      | 0.0                  | 0.7                  | 99.3 |
|                  | NO <sub>y</sub>                                   | 0.0      | 12.8     | 0.0                  | 1.3                  | 98.6 |

|                  |                                      |     |      |     |      |      |
|------------------|--------------------------------------|-----|------|-----|------|------|
| Sim_2018+Jiangsu | P <sub>H2O2</sub> /P <sub>HNO3</sub> | 2.4 | 0.0  | 0.0 | 4.3  | 96.9 |
|                  | HCHO/NO <sub>2</sub>                 | 0.0 | 0.8  | 0.0 | 7.0  | 94.8 |
|                  | HCHO/NO <sub>y</sub>                 | 0.0 | 0.8  | 0.0 | 10.1 | 92.2 |
|                  | NO <sub>y</sub>                      | 0.0 | 8.3  | 0.3 | 0.3  | 97.4 |
| Sim_2018+Other   | P <sub>H2O2</sub> /P <sub>HNO3</sub> | 2.7 | 7.0  | 0.1 | 1.7  | 98.2 |
|                  | HCHO/NO <sub>2</sub>                 | 6.2 | 14.3 | 0.1 | 1.6  | 98.0 |
|                  | HCHO/NO <sub>y</sub>                 | 0.5 | 12.2 | 0.1 | 1.2  | 98.5 |
|                  | NO <sub>y</sub>                      | 0.0 | 51.3 | 0.1 | 1.3  | 97.3 |

**Comment 9:** Lines 450, 491, 521: The format of journal names should be consistent.

**Response 9:** Thank you for your comment. We have updated the reference section.

## References

- Peng, Y.-P., Chen, K.-S., Wang, H.-K., Lai, C.-H., Lin, M.-H., and Lee, C.-H.: Applying model simulation and photochemical indicators to evaluate ozone sensitivity in southern Taiwan, *Journal of Environmental Sciences*, 23, 790-797, 10.1016/s1001-0742(10)60479-2, 2011.
- Sillman, S., He, D., Pippin, M. R., Daum, P. H., Imre, D. G., Kleinman, L. I., Lee, J. H., and Weinstein-Lloyd, J.: Model correlations for ozone, reactive nitrogen, and peroxides for Nashville in comparison with measurements: Implications for O<sub>3</sub>-NO<sub>x</sub>-hydrocarbon chemistry, *Journal of Geophysical Research: Atmospheres*, 103, 22629-22644, 1998.
- Sun, J., Qin, M., Xie, X., Fu, W., Qin, Y., Sheng, L., Li, L., Li, J., Sulaymon, I. D., Jiang, L., Huang, L., Yu, X., and Hu, J.: Seasonal modeling analysis of nitrate formation pathways in Yangtze River Delta region, China, *Atmos. Chem. Phys. Discuss.*, 2022, 1-37, <https://doi.org/10.5194/acp-2022-426>, 2022.
- Wang, S., Xing, J., Jang, C., Zhu, Y., Fu, J. S., and Hao, J.: Impact Assessment of Ammonia Emissions on Inorganic Aerosols in East China Using Response Surface Modeling Technique, *Environmental Science & Technology*, 45, 9293-9300, 10.1021/es2022347, 2011.
- Xie, M., Zhu, K., Wang, T., Yang, H., Zhuang, B., Li, S., Li, M., Zhu, X., and Ouyang, Y.: Application of photochemical indicators to evaluate ozone nonlinear chemistry and pollution control countermeasure in China, *Atmospheric Environment*, 99, 466-473, 10.1016/j.atmosenv.2014.10.013, 2014.
- Zhao, K., Wu, Y., Yuan, Z., Huang, J., Liu, X., Ma, W., Xu, D., Jiang, R., Duan, Y., Fu, Q., and Xu, W.: Understanding the underlying mechanisms governing the linkage between atmospheric oxidative capacity and ozone precursor sensitivity in the Yangtze River Delta, China: A multi-tool ensemble analysis, *Environment International*, 160, 107060, <https://doi.org/10.1016/j.envint.2021.107060>, 2022.
